# Supplementary material for: Synthesis, spectroscopic characterization, X-ray analysis and theoretical studies on the spectral features (FT-IR,1H-NMR), chemical reactivity, NBO analyses of 2-(4-fluorophenyl)-2-(4-fluorophenylamino)acetonitrile and its docking into IDO enzyme
Source: Royal Society of Chemistry journal article supplement (doi:10.1039/c5ra15797h), 2015-01-01
Supplement: c5ra15797h1.pdf [file c5ra15797h1.pdf]

## Supplementary Information

### Synthesis, spectroscopic characterization, X-ray analysis and theoretical studies on the spectral features (FT-IR, <sup>1</sup>H-NMR), chemical reactivity, NBO analyses of 2-(4-fluorophenyl)-2-(4-fluorophenylamino)acetonitrile, and its docking into IDO enzyme

Goutam Brahmachari<sup>a,\*</sup>, Abhishek Kumar<sup>b</sup>, Ambrish Kumar Srivastava<sup>b</sup>, Shashi Gangwar<sup>b</sup>, Neeraj Misra<sup>b</sup>, Vivek K.Gupta<sup>c</sup> and Rajnikant<sup>c</sup>

<sup>a</sup>Laboratory of Natural Products & Organic Synthesis, Department of Chemistry, Visva-Bharati University, Santiniketan-731 235, West Bengal, India.

<sup>b</sup>Department of Physics, University of Lucknow, Lucknow 226007, Uttar Pradesh, India

<sup>c</sup>Post-Graduate Department of Physics & Electronics, University of Jammu, Jammu Tawi - 180 006, India.

\*Corresponding author. Tel./Fax: 91-3463-526; E-mail: [brahmg2001@yahoo.co.in](mailto:brahmg2001@yahoo.co.in); [brahmg2001@gmail.com](mailto:brahmg2001@gmail.com)

This paper is dedicated to Professor Brindaban C. Ranu on the occasion of his 67<sup>th</sup> birthday

|                                                                                                                                                                                            |              |
|--------------------------------------------------------------------------------------------------------------------------------------------------------------------------------------------|--------------|
| <b>Table S1.</b> Selected bond lengths (angstroms), bond angles (degrees) for $\alpha$ -aminonitrile calculated at the B3LYP/6-311++G(d,p) level and compared with experimental data ..... | <b>S1</b>    |
| <b>Table S2.</b> Local reactivity descriptors for $\alpha$ -aminonitrile calculated at B3LYP/6-311++G(d,p) level .....                                                                     | <b>S1</b>    |
| <b>Table S3.</b> Second-order perturbation theory analysis of the Fock matrix in NBO basis for $\alpha$ -aminonitrile <b>1</b> .....                                                       | <b>S2</b>    |
| <b>Figure S1 – S3.</b> Copies of <sup>1</sup> H and <sup>13</sup> C spectra of $\alpha$ -aminonitrile <b>1</b> along with analytical data.....                                             | <b>S4-S6</b> |

## S1

**Table S1.** Selected bond lengths (angstroms), bond angles (degrees) for  $\alpha$ -aminonitrile calculated at the B3LYP/6-311++G(d,p) level and compared with experimental data.

| Parameter   | Calculated | Experimental | Parameter   | Calculated | Experimental |
|-------------|------------|--------------|-------------|------------|--------------|
| C25-C27     | 1.472      | 1.540        | C27-N28     | 1.152      | 1.140        |
| C25-C14     | 1.535      | 1.518        | C25-N12     | 1.460      | 1.451        |
| C21-F24     | 1.353      | 1.359        | N12-C2      | 1.405      | 1.416        |
| C6-F11      | 1.358      | 1.363        | N28-C27-C25 | 179.7      | 177.7        |
| C27-C25-C14 | 110.0      | 111.1        | N12-C25-C27 | 108.4      | 110.9        |
| C7-C6-F11   | 119.3      | 119.3        | C5-C6-F11   | 119.0      | 118.4        |
| C17-C21-F24 | 118.8      | 119.0        | F24-C21-C18 | 118.8      | 118.3        |

**Table S2.** Local reactivity descriptors for  $\alpha$ -aminonitrile calculated at B3LYP/6-311++G(d,p) level

| Atom no. | $f_k^+$ | $f_k^-$ | $s_k^+$ | $s_k^-$ | $\omega_k^+$ | $\omega_k^-$ |
|----------|---------|---------|---------|---------|--------------|--------------|
| 1C       | 0.4410  | -0.2501 | 0.0900  | -0.0510 | 1.3248       | -0.7513      |
| 2C       | 0.2895  | 0.1089  | 0.0590  | 0.0222  | 0.8697       | 0.3271       |
| 3C       | -0.0603 | 0.0782  | -0.0123 | 0.0159  | -0.1811      | 0.2349       |
| 5C       | 0.0518  | 0.0613  | 0.0105  | 0.0125  | 0.1556       | 0.1841       |
| 6C       | -0.0191 | -0.0058 | -0.0039 | -0.0011 | -0.0573      | 0.0174       |
| 7C       | -0.2491 | 0.1895  | -0.0508 | 0.0386  | -0.7483      | 0.5693       |
| 14C      | 0.3338  | -0.0324 | 0.0681  | -0.0066 | 1.0028       | -0.0973      |
| 15C      | 0.4603  | 0.1425  | 0.0939  | 0.0290  | 1.3828       | 0.4281       |
| 16C      | 0.7363  | 0.0003  | 0.1502  | 0.00006 | 2.2119       | 0.0009       |
| 17C      | 0.0713  | -0.0191 | 0.0145  | -0.0039 | 0.2142       | -0.0573      |
| 19C      | 0.0538  | 0.1402  | 0.0109  | 0.0286  | 0.1616       | 0.9211       |
| 21C      | 0.0037  | 0.0324  | 0.0007  | 0.0066  | 0.0111       | 0.0973       |
| 25C      | -0.8113 | 0.1545  | -0.1655 | 0.0315  | -2.4373      | 0.4641       |
| 27C      | 0.4724  | 0.1230  | 0.0964  | 0.0251  | 1.4191       | 0.3695       |

**Table S3.** Second-order perturbation theory analysis of the Fock matrix in NBO basis for  $\alpha$ -aminonitrile. Selected donor (Lewis) and acceptor (non-Lewis) orbitals, percentage electron density over bonded atoms ( $ED_A$ ,  $ED_B$  in %), NBO hybrid orbitals of bonded atoms and stabilization energy of various intramolecular interactions ( $E^{(2)}$ ).

| Donar(i)                          |                          |                                                                                      | Acceptor (j)                       |                          |                                                                                       |                         |
|-----------------------------------|--------------------------|--------------------------------------------------------------------------------------|------------------------------------|--------------------------|---------------------------------------------------------------------------------------|-------------------------|
| Orbital / lp<br>(occupancy)       | $ED_A$ , %<br>$ED_B$ , % | NBO hybrid<br>orbitals                                                               | orbital<br>(occupancy)             | $ED_A$ , %<br>$ED_B$ , % | NBO hybrid<br>orbitals                                                                | $E^{(2)}$<br>(kcal/mol) |
| $\pi$ (C1 - C2)<br>(1.97211)      | 49.08<br>50.92           | 0.7005(sp <sup>1.85</sup> ) <sub>c</sub><br>0.7136(sp <sup>1.75</sup> ) <sub>c</sub> | $\pi^*$ (C3 - C5)<br>(0.34290)     | 49.36<br>50.64           | 0.7025(sp <sup>1.00</sup> ) <sub>c</sub><br>0.7116(sp <sup>1.00</sup> ) <sub>c</sub>  | 18.49                   |
| $\pi$ (C1 - C2)<br>(1.65325)      | 52.42<br>47.58           | 0.7240(sp <sup>1.00</sup> ) <sub>c</sub><br>0.6898(sp <sup>1.00</sup> ) <sub>c</sub> | $\pi^*$ (C6 - C7)<br>(0.02630)     | 50.11<br>49.89           | 0.7079(sp <sup>1.56</sup> ) <sub>c</sub><br>-0.7063(sp <sup>1.91</sup> ) <sub>c</sub> | 21.93                   |
| $\sigma$ (C1 - C7)<br>(1.97084)   | 49.95<br>50.05           | 0.7068(sp <sup>1.79</sup> ) <sub>c</sub><br>0.7074(sp <sup>1.76</sup> ) <sub>c</sub> | $\sigma^*$ (C6 - F11)<br>0.03364   | 72.94<br>27.06           | 0.8541(sp <sup>3.57</sup> ) <sub>c</sub><br>0.5202(sp <sup>2.28</sup> ) <sub>c</sub>  | 4.46                    |
| $\sigma$ (C1 - H10)<br>(1.97667)  | 61.17<br>38.83           | 0.7821(sp <sup>2.43</sup> ) <sub>c</sub><br>0.6231(sp <sup>0.00</sup> ) <sub>c</sub> | $\sigma^*$ (C2 - C3)<br>(0.02115)  | 48.84<br>51.16           | 0.6988(sp <sup>1.80</sup> ) <sub>c</sub><br>-0.7153(sp <sup>1.84</sup> ) <sub>c</sub> | 4.23                    |
| $\sigma$ (C3 - H4)<br>(1.97771)   | 61.02<br>38.98           | 0.7811(sp <sup>2.48</sup> ) <sub>c</sub><br>0.6244(sp <sup>0.00</sup> ) <sub>c</sub> | $\sigma^*$ (C1 - C2)<br>(0.39987)  | 47.58<br>52.42           | 0.6898(sp <sup>1.00</sup> ) <sub>c</sub><br>-0.7240(sp <sup>1.00</sup> ) <sub>c</sub> | 4.51                    |
| $\sigma$ (C3 - C5)<br>(1.97173)   | 49.87<br>50.13           | 0.7062(sp <sup>1.77</sup> ) <sub>c</sub><br>0.7080(sp <sup>1.75</sup> ) <sub>c</sub> | $\sigma^*$ (C6 - F11)<br>(0.03364) | 72.94<br>27.06           | 0.8541(sp <sup>3.57</sup> ) <sub>c</sub><br>-0.5202(sp <sup>2.28</sup> ) <sub>c</sub> | 4.34                    |
| $\pi$ (C3 - C5)<br>(1.71621)      | 50.64<br>49.36           | 0.7116(sp <sup>1.00</sup> ) <sub>c</sub><br>0.7025(sp <sup>1.00</sup> ) <sub>c</sub> | $\pi^*$ (C1 - C2)<br>(0.39987)     | 47.58<br>52.42           | 0.6898(sp <sup>1.00</sup> ) <sub>c</sub><br>-0.7240(sp <sup>1.00</sup> ) <sub>c</sub> | 19.84                   |
| $\pi$ (C3 - C5)<br>(1.97771)      | 50.64<br>49.36           | 0.7240(sp <sup>1.00</sup> ) <sub>c</sub><br>0.6898(sp <sup>1.00</sup> ) <sub>c</sub> | $\pi^*$ (C6 - C7)<br>(0.02630)     | 50.11<br>49.89           | 0.7079(sp <sup>1.56</sup> ) <sub>c</sub><br>-0.7063(sp <sup>1.91</sup> ) <sub>c</sub> | 19.38                   |
| $\sigma$ (C5 - C6)<br>(1.98007)   | 50.12<br>49.88           | 0.7080(sp <sup>1.93</sup> ) <sub>c</sub><br>0.7063(sp <sup>1.00</sup> ) <sub>c</sub> | $\sigma^*$ (C6 - C7)<br>(0.38055)  | 49.07<br>50.93           | 0.7005(sp <sup>1.00</sup> ) <sub>c</sub><br>-0.7136(sp <sup>1.00</sup> ) <sub>c</sub> | 4.30                    |
| $\sigma$ (C6 - C7)<br>(1.98041)   | 49.89<br>50.11           | 0.7240(sp <sup>1.56</sup> ) <sub>c</sub><br>0.6898(sp <sup>1.57</sup> ) <sub>c</sub> | $\sigma^*$ (C5 - C6)<br>(0.02680)  | 49.88<br>50.12           | 0.7063(sp <sup>1.93</sup> ) <sub>c</sub><br>-0.7080(sp <sup>1.57</sup> ) <sub>c</sub> | 4.29                    |
| $\pi$ (C6 - C7)<br>(1.68473)      | 50.93<br>49.07           | 0.7136(sp <sup>1.00</sup> ) <sub>c</sub><br>0.7005(sp <sup>1.00</sup> ) <sub>c</sub> | $\pi^*$ (C1 - C2)<br>(0.39987)     | 47.58<br>52.42           | 0.6898(sp <sup>1.00</sup> ) <sub>c</sub><br>0.7240(sp <sup>1.00</sup> ) <sub>c</sub>  | 17.30                   |
| $\pi$ (C6 - C7)<br>(1.68473)      | 50.93<br>49.07           | 0.7136(sp <sup>1.00</sup> ) <sub>c</sub><br>0.7005(sp <sup>1.00</sup> ) <sub>c</sub> | $\pi^*$ (C3 - C5)<br>(0.34290)     | 49.36<br>50.64           | 0.7025(sp <sup>1.00</sup> ) <sub>c</sub><br>-0.7116(sp <sup>1.00</sup> ) <sub>c</sub> | 20.71                   |
| $\sigma$ (N12 - H13)<br>(1.98185) | 70.26<br>29.74           | 0.8382(sp <sup>3.03</sup> ) <sub>c</sub><br>0.5454(sp <sup>0.00</sup> ) <sub>c</sub> | $\sigma^*$ (C1 - C2)<br>(0.39987)  | 47.58<br>52.42           | 0.6898(sp <sup>1.00</sup> ) <sub>c</sub><br>0.7240(sp <sup>1.00</sup> ) <sub>c</sub>  | 4.08                    |
| $\pi$ (C14 - C16)<br>(1.97425)    | 50.73<br>49.27           | 0.7123(sp <sup>1.00</sup> ) <sub>c</sub><br>0.7019(sp <sup>1.00</sup> ) <sub>c</sub> | $\pi^*$ (C15 - C17)<br>(0.01289)   | 50.14<br>49.86           | 0.7081(sp <sup>1.83</sup> ) <sub>c</sub><br>-0.7061(sp <sup>1.76</sup> ) <sub>c</sub> | 22.33                   |
| $\pi$ (C14 - C16)<br>(1.97320)    | 50.80<br>49.20           | 0.7127(sp <sup>1.85</sup> ) <sub>c</sub><br>0.7014(sp <sup>1.77</sup> ) <sub>c</sub> | $\pi^*$ (C19 - C21)<br>(0.2673)    | 50.03<br>49.97           | 0.7073(sp <sup>1.94</sup> ) <sub>c</sub><br>-0.7069(sp <sup>1.56</sup> ) <sub>c</sub> | 18.92                   |
| $\sigma$ (C14 - C25)<br>(1.96005) | 48.32<br>51.68           | 0.6951(sp <sup>2.35</sup> ) <sub>c</sub><br>0.7189(sp <sup>2.39</sup> ) <sub>c</sub> | $\sigma^*$ (C27 - N28)             | 57.80<br>42.20           | 0.7240(sp <sup>1.00</sup> ) <sub>c</sub><br>0.6898(sp <sup>1.00</sup> ) <sub>c</sub>  | 4.34                    |

|                                   |                |                                                                                      |                                     |                |                                                                                        |       |
|-----------------------------------|----------------|--------------------------------------------------------------------------------------|-------------------------------------|----------------|----------------------------------------------------------------------------------------|-------|
|                                   |                |                                                                                      | (0.01115)                           |                |                                                                                        |       |
| $\sigma$ (C15 - C17)<br>(1.97118) | 49.86<br>50.14 | 0.7061(sp <sup>1.83</sup> ) <sub>c</sub><br>0.7081(sp <sup>1.76</sup> ) <sub>c</sub> | $\sigma^*$ (C21 - F24)<br>(0.03348) | 72.92<br>27.08 | 0.7240(sp <sup>1.00</sup> ) <sub>c</sub><br>0.6898(sp <sup>1.00</sup> ) <sub>c</sub>   | 4.27  |
| $\pi$ (C15 - C17)<br>(1.67115)    | 48.31<br>51.69 | 0.6950(sp <sup>2.50</sup> ) <sub>c</sub><br>0.7190(sp <sup>0.00</sup> ) <sub>c</sub> | $\pi^*$ (C14 - C16)<br>(0.35885)    | 46.77<br>53.23 | 0.6839(sp <sup>99.99</sup> ) <sub>c</sub><br>-0.7296(sp <sup>1.00</sup> ) <sub>c</sub> | 19.29 |
| $\pi$ (C15 - C17)<br>(1.67115)    | 48.31<br>51.69 | 0.6950(sp <sup>1.00</sup> ) <sub>c</sub><br>0.7190(sp <sup>1.00</sup> ) <sub>c</sub> | $\pi^*$ (C19 - C21)<br>(0.02673)    | 50.03<br>49.97 | 0.7073(sp <sup>1.00</sup> ) <sub>c</sub><br>-0.7069(sp <sup>1.00</sup> ) <sub>c</sub>  | 23.14 |
| $\sigma$ (C15 - H18)<br>(1.97817) | 61.25<br>38.75 | 0.7827(sp <sup>2.50</sup> ) <sub>c</sub><br>0.6225(sp <sup>0.00</sup> ) <sub>c</sub> | $\sigma^*$ (C14 - C16)<br>(0.35885) | 46.77<br>53.23 | 0.7240(sp <sup>1.00</sup> ) <sub>c</sub><br>0.6898(sp <sup>1.00</sup> ) <sub>c</sub>   | 4.82  |
| $\sigma$ (C16 - C19)<br>(1.97105) | 49.82<br>50.18 | 0.7058(sp <sup>1.83</sup> ) <sub>c</sub><br>0.7084(sp <sup>1.75</sup> ) <sub>c</sub> | $\sigma^*$ (C21 - F24)<br>(0.03348) | 72.92<br>27.08 | 0.7240(sp <sup>1.00</sup> ) <sub>c</sub><br>0.6898(sp <sup>1.00</sup> ) <sub>c</sub>   | 4.26  |
| $\sigma$ (C16 - H20)<br>(1.97781) | 61.69<br>38.31 | 0.7854(sp <sup>2.45</sup> ) <sub>c</sub><br>0.6190(sp <sup>0.00</sup> ) <sub>c</sub> | $\sigma^*$ (C14 - C15)<br>(0.02198) | 49.27<br>50.73 | 0.7240(sp <sup>1.00</sup> ) <sub>c</sub><br>0.6898(sp <sup>1.00</sup> ) <sub>c</sub>   | 4.89  |
| $\sigma$ (C17 - C21)<br>(1.98051) | 50.00<br>50.00 | 0.7071(sp <sup>1.95</sup> ) <sub>c</sub><br>0.7071(sp <sup>1.56</sup> ) <sub>c</sub> | $\sigma^*$ (C19 - C21)<br>(0.36714) | 48.99<br>51.01 | 0.6999(sp <sup>1.00</sup> ) <sub>c</sub><br>-0.7142(sp <sup>1.00</sup> ) <sub>c</sub>  | 4.08  |
| $\sigma$ (C19 - C21)<br>(1.98065) | 49.97<br>50.03 | 0.7069(sp <sup>1.94</sup> ) <sub>c</sub><br>0.7073(sp <sup>1.56</sup> ) <sub>c</sub> | $\sigma^*$ (C17 - C21)<br>(0.02660) | 50.00<br>50.00 | 0.7071(sp <sup>1.95</sup> ) <sub>c</sub><br>0.7071(sp <sup>1.56</sup> ) <sub>c</sub>   | 4.08  |
| $\pi$ (C19 - C21)<br>(1.65389)    | 51.01<br>48.99 | 0.7142(sp <sup>1.94</sup> ) <sub>c</sub><br>0.6999(sp <sup>1.56</sup> ) <sub>c</sub> | $\pi^*$ (C14 - C16)<br>(0.35385)    | 46.77<br>53.23 | 0.6839(sp <sup>99.99</sup> ) <sub>c</sub><br>-0.7296(sp <sup>1.00</sup> ) <sub>c</sub> | 21.19 |
| $\pi$ (C19 - C21)<br>(1.65389)    | 51.01<br>48.99 | 0.7142(sp <sup>1.94</sup> ) <sub>c</sub><br>0.6999(sp <sup>1.56</sup> ) <sub>c</sub> | $\pi^*$ (C15 - C17)<br>(0.33037)    | 51.69<br>48.31 | 0.7240(sp <sup>1.00</sup> ) <sub>c</sub><br>0.6898(sp <sup>1.00</sup> ) <sub>c</sub>   | 18.81 |
| $\sigma$ (C25 - H26)<br>(1.95462) | 62.86<br>37.14 | 0.7928(sp <sup>3.45</sup> ) <sub>c</sub><br>0.6094(sp <sup>0.00</sup> ) <sub>c</sub> | $\sigma^*$ (C27 - N28)<br>(0.01115) | 57.80<br>42.20 | 0.7603(sp <sup>1.11</sup> ) <sub>c</sub><br>-0.6496(sp <sup>1.10</sup> ) <sub>c</sub>  | 5.20  |
| $\sigma$ (C27 - N28)<br>(1.95575) | 42.20<br>57.80 | 0.6496(sp <sup>1.11</sup> ) <sub>c</sub><br>0.7603(sp <sup>1.10</sup> ) <sub>c</sub> | $\sigma^*$ (C25 - C27)<br>(0.03140) | 49.40<br>50.60 | 0.7029(sp <sup>3.09</sup> ) <sub>c</sub><br>-0.7113(sp <sup>0.89</sup> ) <sub>c</sub>  | 4.95  |
| LP(N28)                           |                |                                                                                      | $\sigma^*$ (C25 - C27)<br>(0.03140) | 49.40<br>50.60 | 0.7029(sp <sup>3.09</sup> ) <sub>c</sub><br>-0.7113(sp <sup>0.89</sup> ) <sub>c</sub>  | 4.07  |
| LP(F11)                           |                |                                                                                      | $\sigma^*$ (C5 - C 6)<br>(0.38055)  | 49.88<br>50.12 | 0.7063(sp <sup>1.93</sup> ) <sub>c</sub><br>-0.7080(sp <sup>1.57</sup> ) <sub>c</sub>  | 5.84  |
| LP(F11)                           |                |                                                                                      | $\sigma^*$ (C6 - C 7)<br>(0.02630)  | 49.07<br>50.93 | 0.7029(sp <sup>3.09</sup> ) <sub>c</sub><br>-0.7113(sp <sup>0.89</sup> ) <sub>c</sub>  | 5.79  |
| LP(F11)                           |                |                                                                                      | $\pi^*$ (C6 - C 7)<br>(0.38055)     | 50.11<br>49.89 | 0.7005(sp <sup>1.00</sup> ) <sub>c</sub><br>-0.7136(sp <sup>1.00</sup> ) <sub>c</sub>  | 16.46 |
| LP(N12)                           |                |                                                                                      | $\pi^*$ (C1 - C 2)<br>(0.02351)     | 50.92<br>49.08 | 0.7136(sp <sup>3.09</sup> ) <sub>c</sub><br>-0.7005(sp <sup>0.89</sup> ) <sub>c</sub>  | 28.27 |
| LP(N12)                           |                |                                                                                      | $\sigma^*$ (C14 -                   | 49.27          | 0.7019(sp <sup>1.85</sup> ) <sub>c</sub>                                               | 4.46  |

|         |  |  |                               |                |                                                                                       |       |
|---------|--|--|-------------------------------|----------------|---------------------------------------------------------------------------------------|-------|
|         |  |  | C25)<br>(0.02198)             | 50.73          | -0.7123(sp <sup>1.77</sup> ) <sub>c</sub>                                             |       |
| LP(N12) |  |  | σ*(C25 -<br>H26)<br>(0.03416) | 37.14<br>62.86 | 0.6094(sp <sup>3.45</sup> ) <sub>c</sub><br>-0.7928(sp <sup>0.00</sup> ) <sub>c</sub> | 5.76  |
| LP(F24) |  |  | σ*(C17 -<br>C21)<br>(0.02660) | 50.00<br>50.00 | 0.7071(sp <sup>1.95</sup> ) <sub>c</sub><br>-0.7071(sp <sup>1.56</sup> ) <sub>c</sub> | 5.90  |
| LP(F24) |  |  | σ*(C19 -<br>C21)<br>(0.2673)  | 50.03<br>49.97 | 0.7073(sp <sup>1.94</sup> ) <sub>c</sub><br>-0.7069(sp <sup>1.56</sup> ) <sub>c</sub> | 5.89  |
| LP(F24) |  |  | π*(C19 -<br>C21)<br>(0.36714) | 48.99<br>51.01 | 0.6999(sp <sup>1.00</sup> ) <sub>c</sub><br>-0.7142(sp <sup>1.00</sup> ) <sub>c</sub> | 17.71 |
| LP(N28) |  |  | σ*(C25 -<br>C27)<br>(0.03140) | 49.40<br>50.60 | 0.7029(sp <sup>3.09</sup> ) <sub>c</sub><br>-0.7113(sp <sup>0.89</sup> ) <sub>c</sub> | 10.49 |

**Scanned <sup>1</sup>H-NMR and <sup>13</sup>C-NMR spectra of 2-(4-fluorophenyl)-2-(4-fluorophenylamino)acetonitrile (1):**

Yield 0.220 gm (90%); white solid; m.p. 116-118 °C; *R<sub>f</sub>* 0.434 (PE:EtOAc 90:10), [α]<sub>D</sub><sup>30</sup> = ±0°; FT-IR ν<sub>max</sub> (KBr): 3331, 3063, 2924, 2236, 1605, 1505, 1418, 1233, 1105, 1018, 937, 833, 723, 671, 519, 453 cm<sup>-1</sup>; <sup>1</sup>H NMR (500 MHz, CDCl<sub>3</sub>): δ 7.57 (dd, *J* = 8.5, 5 Hz, 2H, Ar-*H*), 7.14 (t, *J* = 8.5 Hz, 2H, Ar-*H*), 6.97 (t, *J* = 8.5 Hz, 2H, Ar-*H*), 6.73-6.71 (m, 2H, Ar-*H*), 5.34 (d, *J* = 9 Hz, 1H, CH(CN)-NH-), 3.97 (d, *J* = 8.5 Hz, 1H, CH(CN)-NH-). <sup>13</sup>C NMR: (125 MHz, CDCl<sub>3</sub>): 164.27, 162.29, 158.45, 156.55, 140.76, 140.74, 129.64, 129.62, 129.21, 129.14, 118.01, 116.49, 116.31, 116.30, 116.12, 115.91, 115.85, 50.39; *Anal. Calcd.* for C<sub>14</sub>H<sub>10</sub>F<sub>2</sub>N<sub>2</sub>: C, 68.85, H, 4.13, N, 11.47; TOF-MS: *calcd.* for C<sub>14</sub>H<sub>10</sub>F<sub>2</sub>N<sub>2</sub>Na at *m/z* 267.0710 [M + Na]<sup>+</sup>; *found* at *m/z* 267.0706 [M + Na]<sup>+</sup>.

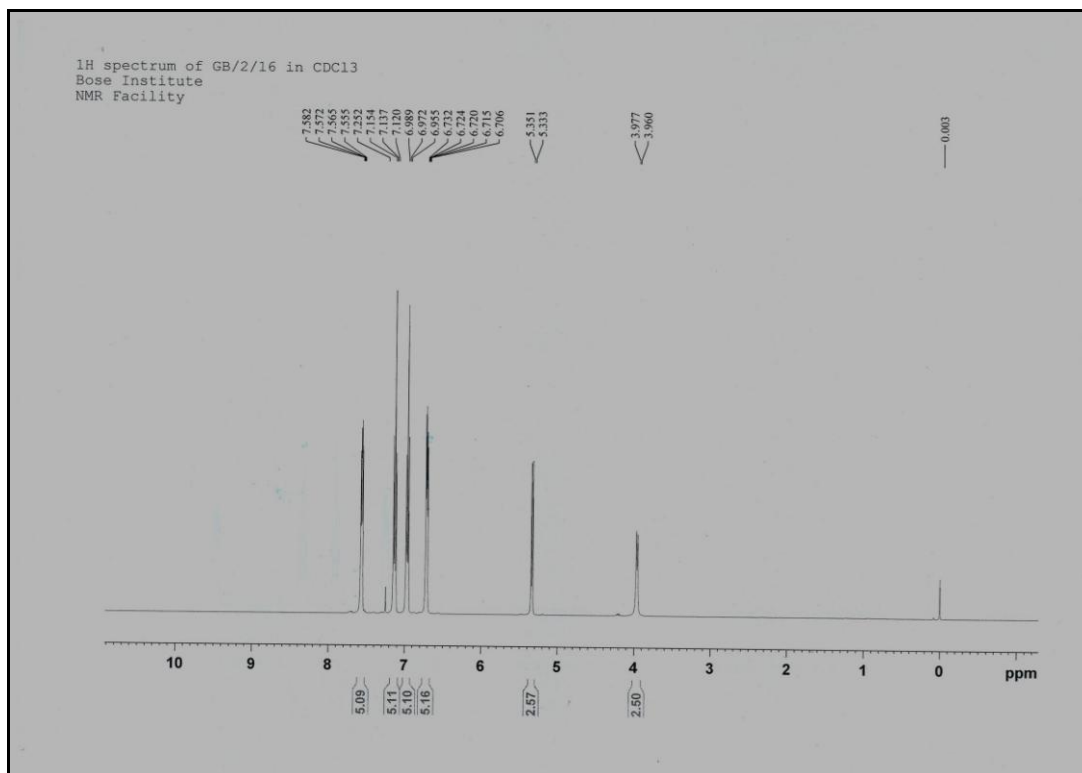

Figure S1. <sup>1</sup>H-NMR spectrum of  $\alpha$ -aminonitrile **1**

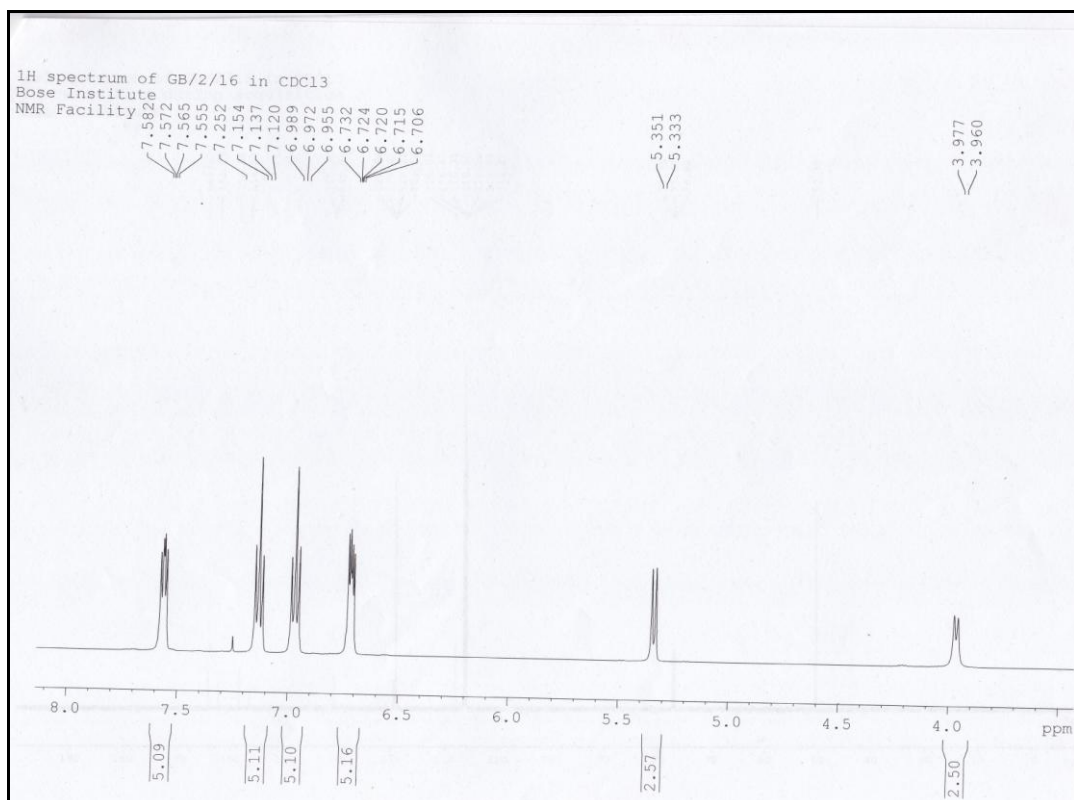

Figure S2. <sup>1</sup>H-NMR spectrum (extended scale) of  $\alpha$ -aminonitrile **1**

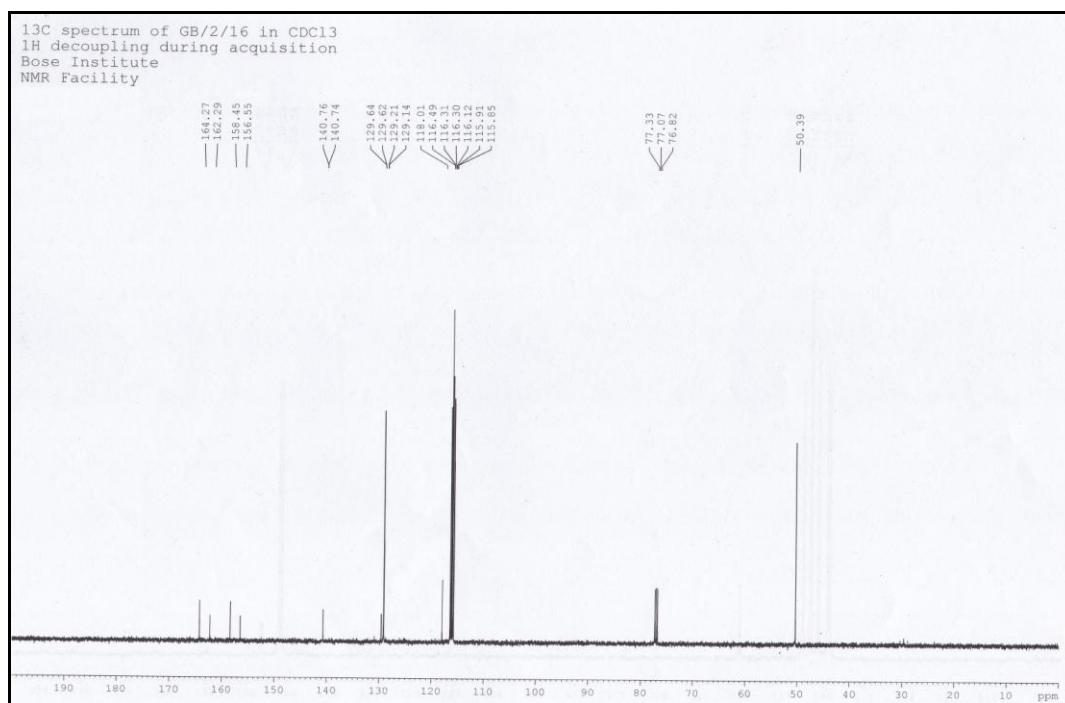

**Figure S3.**  $^{13}\text{C}$ -NMR spectrum of  $\alpha$ -aminonitrile **1**
